# Supplementary material
Source: PubMed Central journal article supplement (PMC7363530)
Supplement: NIHMS1592539-supplement-supinfo.pdf [file NIHMS1592539-supplement-supinfo.pdf]

## Supplemental Methods

### Reactome pathways

Genes related to a taxonomic identifier (Homo sapiens: tax id = 9606) were used exclusively and without literature extension by orthology. To integrate these genes/proteins into molecular pathways of NAFLD, we used the overrepresentation test provided by the PANTHER resource using as input list ('reference' list) the terms retrieved from data mining. We identified 344 Reactome pathways enriched with NAFLD-terms with  $p$  values that ranged from  $4.92E-2$  to  $5.43E-76$ . We used WebGestalt (WEB-based Gene SeTAnaLysis Toolkit) functional enrichment analysis (99) available at <http://webgestalt.org/>.

# Reactome pathway of the list of genes causing monogenic disorders associated with liver steatosis

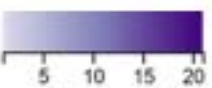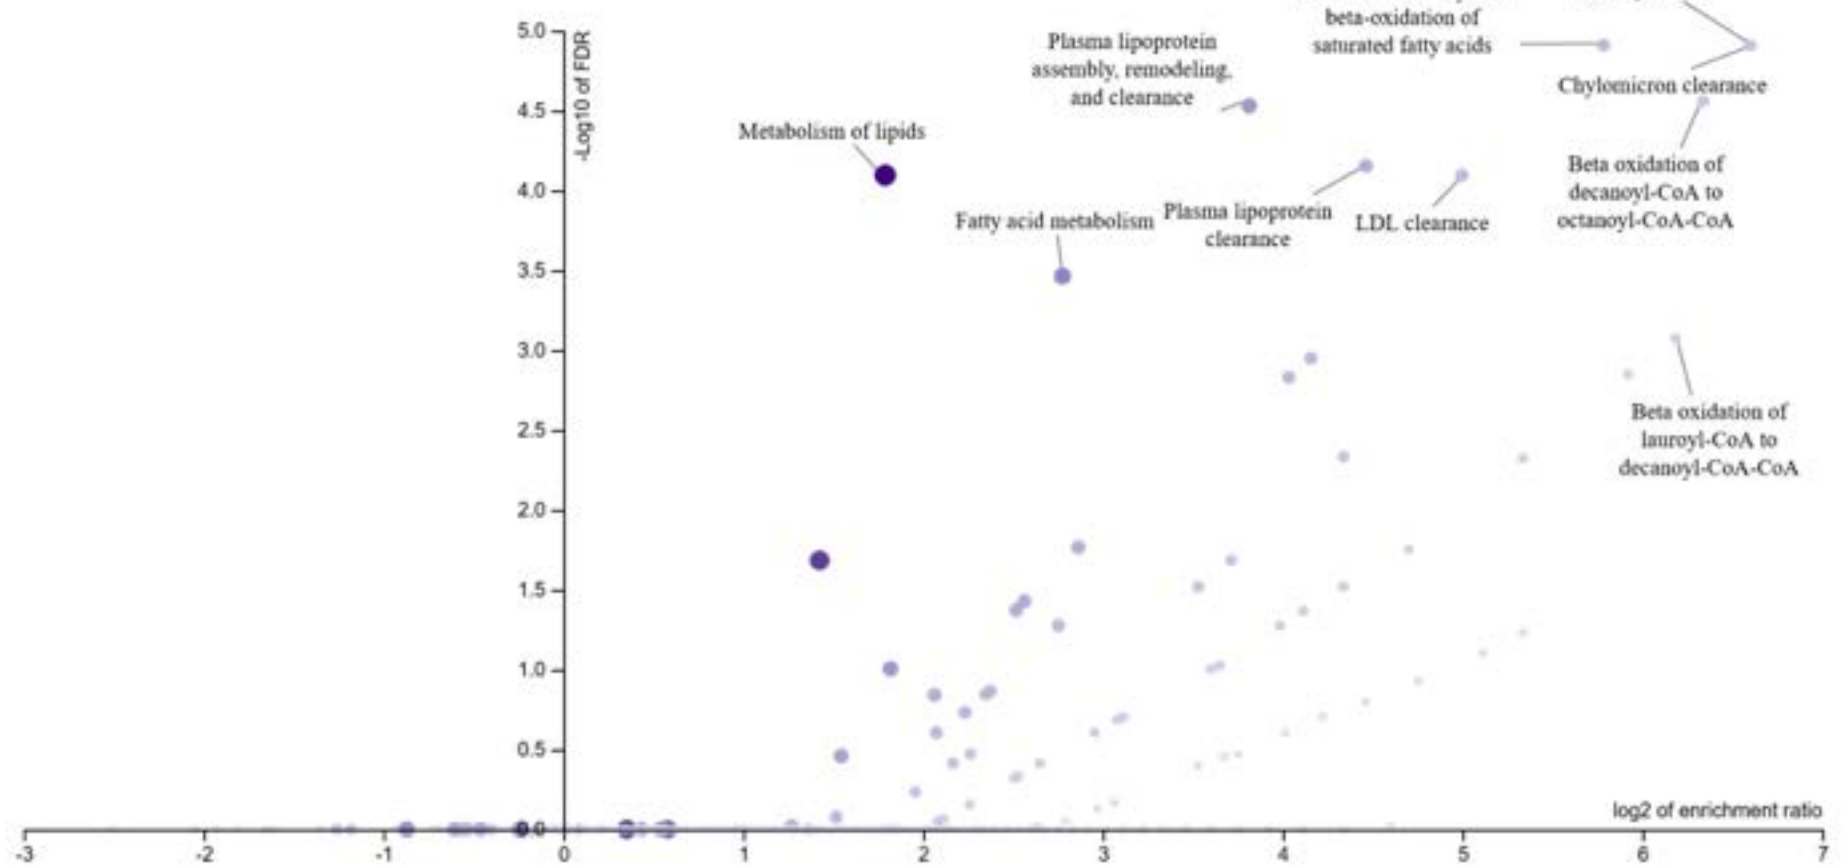

## Supplemental Figure 1

Reactome pathway analysis of genes causing monogenic disorders with hepatic steatosis.

Enrichment method: ORA (over-representation analysis). Enrichment Categories: pathway\_Reactome (data source: <https://www.reactome.org/> and <http://www.geneontology.org>). Reference list: list of genes associated with fatty infiltration of liver, Fatty liver, Steatosis, Liver steatosis" (HP:0001397). Cross References: *SNOMEDCT\_US:197321007*, *UMLS:C2711227*, *SNOMEDCT\_US:442191002*, *MSH:D005234* in the Human Phenotype Ontology (<https://hpo.jax.org/>). Organism: Homo sapiens. FDR Method: Benjamini-Hochberg. The size and color of the dot is proportional to the number of overlapping (for ORA) or leading edge genes (for GSEA) of the category. ORA was performed by the WebGestalt (WEB-based Gene SeTAnaLysis Toolkit) functional enrichment analysis web tool available at <http://www.webgestalt.org/>.

**Supplemental Table 1: Hereditary disorders associated with hepatic steatosis.**

| DISEASE ID   | ASSOCIATED DISEASE NAME                              | GENE ID   |
|--------------|------------------------------------------------------|-----------|
| ORPHA:254346 | 19p13.12 microdeletion syndrome                      | -         |
| ORPHA:1606   | 1p36 deletion syndrome                               | GABRD     |
|              |                                                      | RERE      |
|              |                                                      | PRDM16    |
|              |                                                      | SKI       |
| OMIM:610198  | 3-methylglutaconic aciduria, Type V                  | DNAJC19   |
| OMIM:231530  | 3-hydroxyacyl-coA dehydrogenase deficiency           | HADH *    |
| OMIM:210200  | 3-methylcrotonyl-coA carboxylase 1 deficiency        | MCCC1     |
| ORPHA:445038 | 3-methylglutaconic aciduria type 7                   | CLPB      |
| ORPHA:79086  | Acquired generalized lipodystrophy                   | -         |
| ORPHA:79087  | Acquired partial lipodystrophy                       | LMNB2     |
| ORPHA:99901  | Acyl-coA dehydrogenase 9 deficiency                  | ACAD9     |
| OMIM:201450  | Acyl-coA dehydrogenase, medium-chain deficiency      | ACADM     |
| OMIM:201475  | Acyl-coA dehydrogenase, very long-chain deficiency   | ACADVL    |
| OMIM:300270  | Adrenomyodystrophy                                   | -         |
| ORPHA:977    | Adrenomyodystrophy                                   | -         |
| ORPHA:139507 | African iron overload                                | -         |
| ORPHA:79085  | Akt2-related familial partial lipodystrophy          | AKT2 *    |
| ORPHA:404454 | Alacrimia-choreoathetosis-liver dysfunction syndrome | NGLY1     |
| ORPHA:64     | Alström syndrome                                     | ALMS1 *   |
| OMIM:203800  | Alström syndrome                                     | ALMS1 *   |
| OMIM:243910  | Arima syndrome                                       | -         |
| ORPHA:91     | Aromatase deficiency                                 | CYP19A1 * |
| ORPHA:79474  | Atypical Werner syndrome                             | LMNA      |
| ORPHA:2137   | Autoimmune hepatitis                                 | -         |

|                     |                                                                                    |           |
|---------------------|------------------------------------------------------------------------------------|-----------|
| <b>ORPHA:369840</b> | Autosomal recessive limb-girdle muscular dystrophy Type 2                          | TRAPPC11  |
| <b>ORPHA:280365</b> | Autosomal semi-dominant severe lipodystrophic laminopathy                          | LMNA      |
| <b>ORPHA:528</b>    | Berardinelli-Seip congenital lipodystrophy                                         | BSCL2     |
|                     |                                                                                    | CAV1      |
|                     |                                                                                    | CAVIN1    |
|                     |                                                                                    | AGPAT2    |
|                     |                                                                                    | PPARG *   |
| <b>OMIM:615119</b>  | Cardioencephalomyopathy, fatal infantile, due to cytochrome C oxidase deficiency 2 | COX15     |
| <b>OMIM:212140</b>  | Carnitine deficiency, systemic primary                                             | SLC22A5   |
| <b>OMIM:255120</b>  | Carnitine palmitoyltransferase I deficiency                                        | CPT1A *   |
| <b>OMIM:600649</b>  | Carnitine palmitoyltransferase II deficiency, infantile                            | CPT2 *    |
| <b>OMIM:608836</b>  | Carnitine palmitoyltransferase II deficiency, lethal neonatal                      | CPT2 *    |
| <b>OMIM:275630</b>  | Chanarin-Dorfman syndrome                                                          | ABHD5 *   |
| <b>OMIM:618400</b>  | Charcot-Marie-Tooth disease, axonal, type 2ee                                      | MPV17     |
| <b>ORPHA:71</b>     | Chylomicron retention Disease                                                      | SAR1B     |
| <b>ORPHA:435651</b> | Cidec-related familial partial lipodystrophy                                       | CIDEC *   |
| <b>ORPHA:247585</b> | Citrullinemia type li                                                              | SLC25A13* |
| <b>OMIM:603471</b>  | Citrullinemia, type li, adult-onset                                                | SLC25A13* |
| <b>OMIM:614922</b>  | Combined oxidative phosphorylation deficiency 11                                   | RMND1     |
| <b>OMIM:614924</b>  | Combined oxidative phosphorylation deficiency 12                                   | EARS2     |
| <b>OMIM:615395</b>  | Combined oxidative phosphorylation deficiency 16                                   | MRPL44    |
| <b>OMIM:615595</b>  | Combined oxidative phosphorylation deficiency 19                                   | LYRM4     |
| <b>OMIM:615918</b>  | Combined oxidative phosphorylation deficiency 21                                   | TARS2     |
| <b>OMIM:616672</b>  | Combined oxidative phosphorylation deficiency 27                                   | CARS2     |
| <b>OMIM:617872</b>  | Combined oxidative phosphorylation deficiency 34                                   | MRPS7     |
| <b>OMIM:212065</b>  | Congenital disorder of glycosylation, type Ia                                      | PMM2      |

|                     |                                                                                  |                                                     |
|---------------------|----------------------------------------------------------------------------------|-----------------------------------------------------|
| <b>OMIM:614576</b>  | Congenital disorder of glycosylation, type Iii                                   | COG6                                                |
| <b>OMIM:616829</b>  | Congenital disorder of glycosylation, type Iip                                   | TMEM199                                             |
| <b>OMIM:614921</b>  | Congenital disorder of glycosylation, type Iit                                   | PGM1                                                |
| <b>OMIM:261515</b>  | D-bifunctional protein deficiency                                                | HSD17B4                                             |
| <b>ORPHA:300536</b> | DDOST-CDG (Developmental delay, hypotonia, strabismus and hepatic dysfunction)   | DDOST                                               |
| <b>ORPHA:66634</b>  | Dilated cardiomyopathy with ataxia                                               | DNAJC19                                             |
| <b>ORPHA:412</b>    | Dysbetalipoproteinemia                                                           | APOE *                                              |
| <b>ORPHA:444490</b> | Familial chylomicronemia syndrome                                                | -                                                   |
| <b>ORPHA:2348</b>   | Familial partial lipodystrophy, Dunnigan type                                    | LMNA                                                |
| <b>ORPHA:79084</b>  | Familial partial lipodystrophy, Köbberling type                                  | LMNA                                                |
| <b>OMIM:613282</b>  | Fatty liver disease, nonalcoholic, susceptibility to, 1                          | -                                                   |
| <b>OMIM:613387</b>  | Fatty liver disease, nonalcoholic, susceptibility to, 2                          | -                                                   |
| <b>OMIM:229600</b>  | Fructose intolerance, hereditary                                                 | ALDOB *                                             |
| <b>ORPHA:348</b>    | Fructose-1,6-bisphosphatase deficiency                                           | FBP1 *                                              |
| <b>ORPHA:264580</b> | Glycogen storage disease due to liver phosphorylase kinase deficiency            | PHKG2<br>PHKA2                                      |
| <b>ORPHA:53693</b>  | Gracile syndrome                                                                 | BCS1L                                               |
| <b>OMIM:617093</b>  | Growth retardation, impaired intellectual development, hypotonia and hepatopathy | ARS1                                                |
| <b>ORPHA:139491</b> | Hemochromatosis type 4                                                           | SLC40A1 *                                           |
| <b>ORPHA:93111</b>  | Hnf1b-related autosomal dominant tubulointerstitial kidney disease               | HNF4A *<br>HNF1B *                                  |
| <b>OMIM:236200</b>  | Homocystinuria due to cystathionine beta-synthase deficiency                     | CBS *                                               |
| <b>ORPHA:391665</b> | Homozygous familial hypercholesterolemia                                         | LDLRAP1 *<br>LDLR *<br>PCSK9 *<br>APOB *<br>ABCG8 * |

|                     |                                                                                                        |           |
|---------------------|--------------------------------------------------------------------------------------------------------|-----------|
|                     |                                                                                                        | ABCG5 *   |
| <b>ORPHA:740</b>    | Hutchinson-Gilford progeria syndrome                                                                   | LMNA *    |
|                     |                                                                                                        | ZMPSTE24  |
| <b>ORPHA:209902</b> | Hypercholesterolemia due to cholesterol 7alpha-hydroxylase deficiency                                  |           |
| <b>ORPHA:71212</b>  | Hyperinsulinism due to short chain 3-hydroxylacyl-coA dehydrogenase deficiency                         | HADH      |
| <b>OMIM:614300</b>  | Hypermethioninemia due to adenosine kinase deficiency                                                  | ADK       |
| <b>OMIM:614480</b>  | Hypertriglyceridemia, transient infantile                                                              | GPD1 *    |
| <b>OMIM:300972</b>  | Immunodeficiency 47                                                                                    | ATP6AP1   |
| <b>ORPHA:52430</b>  | Inclusion body myopathy with Paget disease of bone and frontotemporal dementia                         | HNRNPA2B1 |
|                     |                                                                                                        | HNRNPA1   |
|                     |                                                                                                        | VCP       |
| <b>OMIM:615438</b>  | Infantile liver failure syndrome 1                                                                     | LARS1     |
| <b>OMIM:615486</b>  | Interstitial lung and liver disease                                                                    | MARS1     |
| <b>OMIM:220111</b>  | Leigh syndrome, French Canadian type                                                                   | LRPPRC    |
| <b>ORPHA:435660</b> | LIPE-related familial partial lipodystrophy                                                            | LIPE *    |
| <b>ORPHA:156156</b> | Lipoatrophy with diabetes, leukomelanodermic papules, liver steatosis, and hypertrophic cardiomyopathy | -         |
| <b>OMIM:608594</b>  | Lipodystrophy, congenital generalized, type 1                                                          | AGPAT2 *  |
| <b>OMIM:269700</b>  | Lipodystrophy, congenital generalized, type 2                                                          | BSCL2     |
| <b>OMIM:612526</b>  | Lipodystrophy, congenital generalized, type 3                                                          | CAV1 *    |
| <b>OMIM:613327</b>  | Lipodystrophy, congenital generalized, type 4                                                          | CAVIN1    |
| <b>OMIM:151660</b>  | Lipodystrophy, familial partial, type 2                                                                | LMNA      |
| <b>OMIM:604367</b>  | Lipodystrophy, familial partial type 3                                                                 | PPARG     |
| <b>OMIM:613877</b>  | Lipodystrophy, familial partial type 4                                                                 | PLIN1 *   |
| <b>OMIM:615238</b>  | Lipodystrophy, familial partial, type 5                                                                | CIDEC     |
| <b>OMIM:615980</b>  | Lipodystrophy, familial partial, type 6                                                                | LIPE      |
| <b>OMIM:613070</b>  | Liver failure, infantile, transient                                                                    | TRMU      |

|                     |                                                                                    |                       |
|---------------------|------------------------------------------------------------------------------------|-----------------------|
| <b>ORPHA:99900</b>  | Long chain acyl-coA dehydrogenase deficiency                                       | -                     |
| <b>ORPHA:275761</b> | Lysosomal acid lipase deficiency                                                   | -                     |
| <b>OMIM:278000</b>  | Lysosomal acid lipase deficiency                                                   | LIPA *                |
| <b>OMIM:615381</b>  | Mandibular hypoplasia, deafness, progeroid features,<br>and lipodystrophy syndrome | POLD1                 |
| <b>ORPHA:42</b>     | Medium chain acyl-coA dehydrogenase deficiency                                     | ACADM                 |
| <b>ORPHA:436182</b> | Microcephalic primordial dwarfism-insulin resistance Syndrome                      | NSMCE2<br>XRCC4       |
| <b>OMIM:611126</b>  | Mitochondrial complex I deficiency due to Acad9 deficiency                         | ACAD9                 |
| <b>OMIM:618234</b>  | Mitochondrial complex I deficiency, nuclear type 11                                | NDUFAF1               |
| <b>OMIM:124000</b>  | Mitochondrial complex III deficiency, nuclear type 1                               | BCS1L                 |
| <b>OMIM:617156</b>  | Mitochondrial DNA depletion syndrome 15 (hepatocerebral Type)                      | TFAM                  |
| <b>OMIM:251880</b>  | Mitochondrial DNA depletion syndrome 3 (hepatocerebral Type)                       | DGUOK *               |
| <b>OMIM:203700</b>  | Mitochondrial DNA depletion syndrome 4a (Alpers Type)                              | POLG                  |
| <b>ORPHA:298</b>    | Mitochondrial neurogastrointestinal encephalomyopathy                              | POLG<br>RRM2B<br>TYMP |
| <b>ORPHA:746</b>    | Mitochondrial trifunctional protein deficiency                                     | HADHA<br>HADHB        |
| <b>ORPHA:96168</b>  | Monosomy 13q34                                                                     | -                     |
| <b>ORPHA:99226</b>  | Monosomy X                                                                         | -                     |
| <b>OMIM:615703</b>  | Morbid obesity and spermatogenic failure                                           | CEP19                 |
| <b>ORPHA:99228</b>  | Mosaic monosomy X                                                                  | -                     |
| <b>OMIM:617303</b>  | Mucopolysaccharidosis-plus syndrome                                                | VPS33A                |
| <b>OMIM:231680</b>  | Multiple acyl-coA dehydrogenase deficiency                                         | ETFB<br>ETFA<br>ETFDH |



|                     |                                                                                                   |          |
|---------------------|---------------------------------------------------------------------------------------------------|----------|
| <b>OMIM:615356</b>  | Muscular dystrophy, limb-girdle, autosomal Recessive 18                                           | TRAPPC11 |
| <b>OMIM:256810</b>  | Navajo neurohepatopathy                                                                           | MPV17    |
| <b>ORPHA:247598</b> | Neonatal intrahepatic cholestasis due To citrin deficiency                                        | SLC25A13 |
| <b>OMIM:616263</b>  | Neurologic, endocrine and pancreatic disease, multisystem, infantile-onset                        | PTRH2    |
| <b>ORPHA:98907</b>  | Neutral lipid storage disease with ichthyosis                                                     | ABHD5    |
| <b>OMIM:610717</b>  | Neutral lipid storage disease with myopathy                                                       | PNPLA2 * |
| <b>ORPHA:98908</b>  | Neutral lipid storage myopathy                                                                    | PNPLA2   |
| <b>ORPHA:436271</b> | Non-progressive predominantly posterior cavitating leukoencephalopathy with peripheral neuropathy | COA8     |
| <b>OMIM:601466</b>  | Patent ductus venosus                                                                             | -        |
| <b>OMIM:264470</b>  | Peroxisomal acyl-coA oxidase deficiency                                                           | ACOX1    |
| <b>OMIM:261650</b>  | Phosphoenolpyruvate carboxykinase 2, mitochondrial                                                | PCK2 *   |
| <b>OMIM:261680</b>  | Phosphoenolpyruvate carboxykinase deficiency, cytosolic                                           | PCK1 *   |
| <b>ORPHA:280356</b> | Plin1-related familial partial lipodystrophy                                                      | PLIN1    |
| <b>ORPHA:101330</b> | Porphyria cutanea tarda                                                                           | -        |
| <b>ORPHA:79083</b>  | Pparg-related familial partial lipodystrophy                                                      | PPARG    |
| <b>ORPHA:90970</b>  | Primary lipodystrophy                                                                             | -        |
| <b>ORPHA:2959</b>   | Progeria-short stature-pigmented nevi syndrome                                                    | -        |
| <b>OMIM:613658</b>  | Rajab interstitial lung disease with brain calcifications                                         | FARSB    |
| <b>OMIM:617253</b>  | Seckel syndrome 10                                                                                | NSMCE2   |
| <b>ORPHA:363400</b> | Severe neurodegenerative syndrome with lipodystrophy                                              | BSCL2 *  |
| <b>ORPHA:465508</b> | Symptomatic Form of hemochromatosis type 1                                                        | HFE *    |
| <b>ORPHA:881</b>    | Turner syndrome                                                                                   | -        |
| <b>ORPHA:99413</b>  | Turner syndrome due to structural X chromosome anomalies                                          | -        |
| <b>OMIM:228100</b>  | Visceral steatosis, congenital                                                                    | -        |
| <b>ORPHA:3455</b>   | Wiedemann-Rautenstrauch syndrome                                                                  | POLR3A   |

This search was performed using The Human Phenotype Ontology (<https://hpo.jax.org/>) database, which contains 3,000 terms and over 156,000 annotations to hereditary diseases. We searched for disease terms: "Fatty infiltration of liver, Fatty liver, Steatosis, Liver steatosis" Hepatic steatosis HP:0001397. Cross References: *SNOMEDCT\_US:197321007*, *UMLS:C2711227*, *SNOMEDCT\_US:442191002*, *MSH:D005234*. Source of disease ID: Orphanet, DECIPHER, and OMIM. \*

The list includes genes associated with the pathogenesis of NAFLD identified in previous human studies and are included in the enrichment analysis.
